# Supplementary material for: Assessment of the efficacy of agarose and agarose augmented with zinc oxide, carbon dots, and graphitic carbon nitride nanostructures in the restoration of historic tintype
Source: Royal Society of Chemistry journal article supplement (doi:10.1039/d6ra00164e), 2026-03-18
Supplement: d6ra00164e1.pdf [file d6ra00164e1.pdf]

## Assessment of the Efficacy of Agarose and Agarose Augmented with Zinc Oxide, Carbon Dots, and Graphitic Carbon Nitride Nanostructures in the Restoration of Historic Tintype

Hadeer M. ELDeeb <sup>\*a</sup>, Mona F. Ali <sup>a</sup>, Maha A. Ali <sup>a</sup>, Nasser N.Morgan <sup>b</sup>, Ahmed N. Emam <sup>c, d\*</sup>

<sup>a</sup> Conservation Department, Faculty of Archaeology, Cairo University, Giza, Egypt  
12613 Orman, Giza, Egypt.

<sup>b</sup> Physics Department, Faculty of Science, Al-Azhar University, Cairo 11884, Egypt.

<sup>c</sup> Refractories, Ceramics and Building Materials Department, Advanced Materials Technology & Mineral Resources Research Institute, National Research Centre (NRC), El Bohouth St., Dokki, 12622 Cairo, Egypt. **ORCID ID: 0000-0002-4762-1600, Email: [ahmed.gsc.ndp@gmail.com](mailto:ahmed.gsc.ndp@gmail.com)**

<sup>d</sup> Nanomedicine & Tissue Engineering Research Lab, Medical Research Centre of Excellence, National Research Centre (NRC), El Bohouth St., Dokki, 12622 Cairo, Egypt. **Email: [an.emam@nrc.sci.eg](mailto:an.emam@nrc.sci.eg)**

### **For Correspondence:**

Hadeer Mamdouh ELDEEB. Email: [hadeermamdouh010@gmail.com](mailto:hadeermamdouh010@gmail.com)  
, [hadeermamdouh010@cu.edu.eg](mailto:hadeermamdouh010@cu.edu.eg)

Ahmed N. Emam Email: [an.emam@nrc.sci.eg](mailto:an.emam@nrc.sci.eg), [ahmed.gsc.ndp@gmail.com](mailto:ahmed.gsc.ndp@gmail.com)

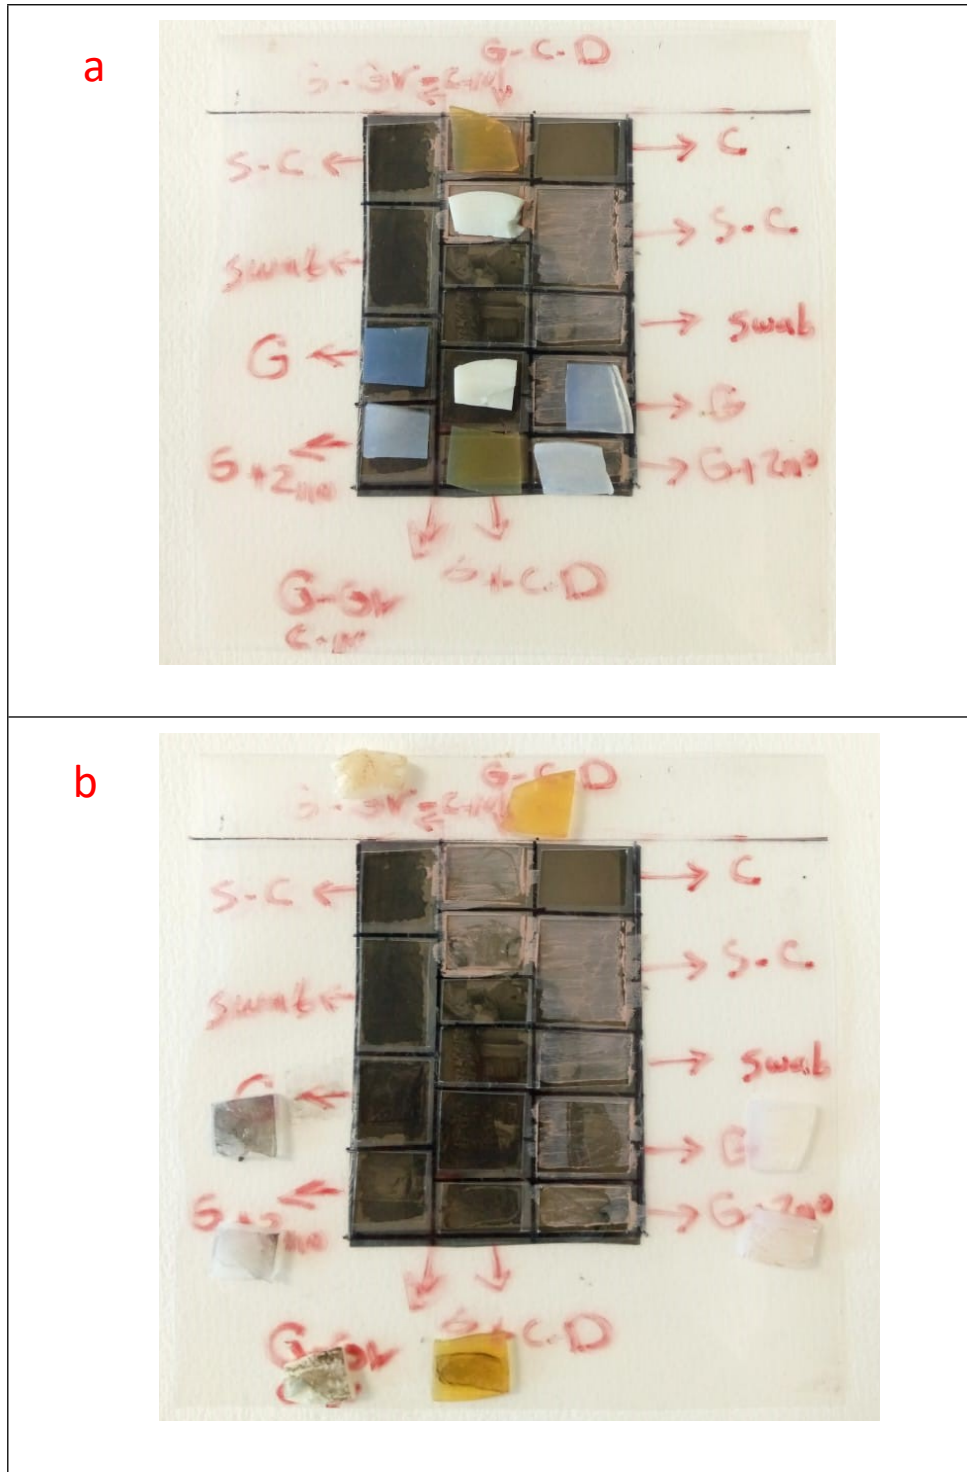

Figure S1. (a) Illustration of the gel application procedure on the sample surface. (b) Comparative cleaning efficiency of the different gel formulations.
